# Supplementary material for: A comparative study on the structural, optical and magnetic properties of Fe3O4 and Fe3O4@SiO2 core–shell microspheres along with an assessment of their potentiality as electrochemical double layer capacitors
Source: Royal Society of Chemistry journal article supplement (doi:10.1039/c4dt02551b), 2015-01-01
Supplement: c4dt02551b1.pdf [file c4dt02551b1.pdf]

# **A comparative study on structural, optical and magnetic properties of $\text{Fe}_3\text{O}_4$ and $\text{Fe}_3\text{O}_4@\text{SiO}_2$ core-shell microspheres along with assessment of their potentiality as electrochemical double layer capacitor**

S. Majumder,<sup>a, b</sup> S. Dey,<sup>a</sup> K. Bagani,<sup>b</sup> S. K. Dey,<sup>a</sup> S. Banerjee<sup>b,\*</sup> and S. Kumar<sup>a,\*</sup>

<sup>a</sup> Department of Physics, Jadavpur University, Kolkata – 700032, India

<sup>b</sup> Saha Institute of Nuclear Physics , 1/AF Bidhannagar, Kolkata – 700064, India

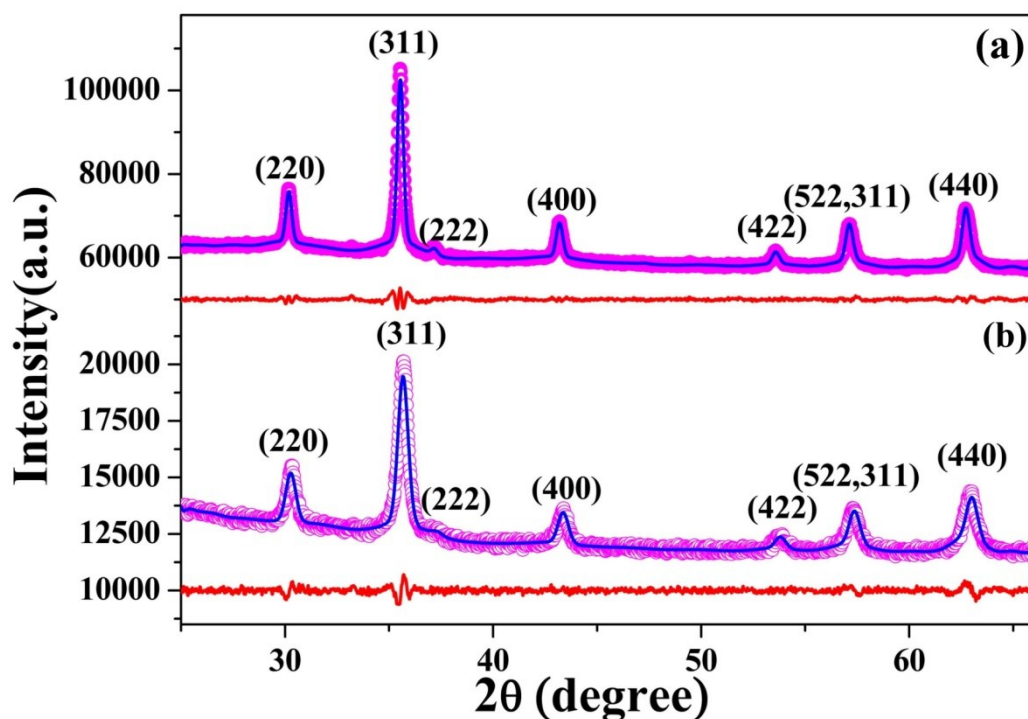

**Fig S1.** Rietveld refinement plot of (a) S1 and (b) S2 by using MAUD2.33 software package.

The pink symbols represent the experimental data points and the continuous blue line represents the simulated pattern. The respective residue has been plotted at the bottoms (red line).

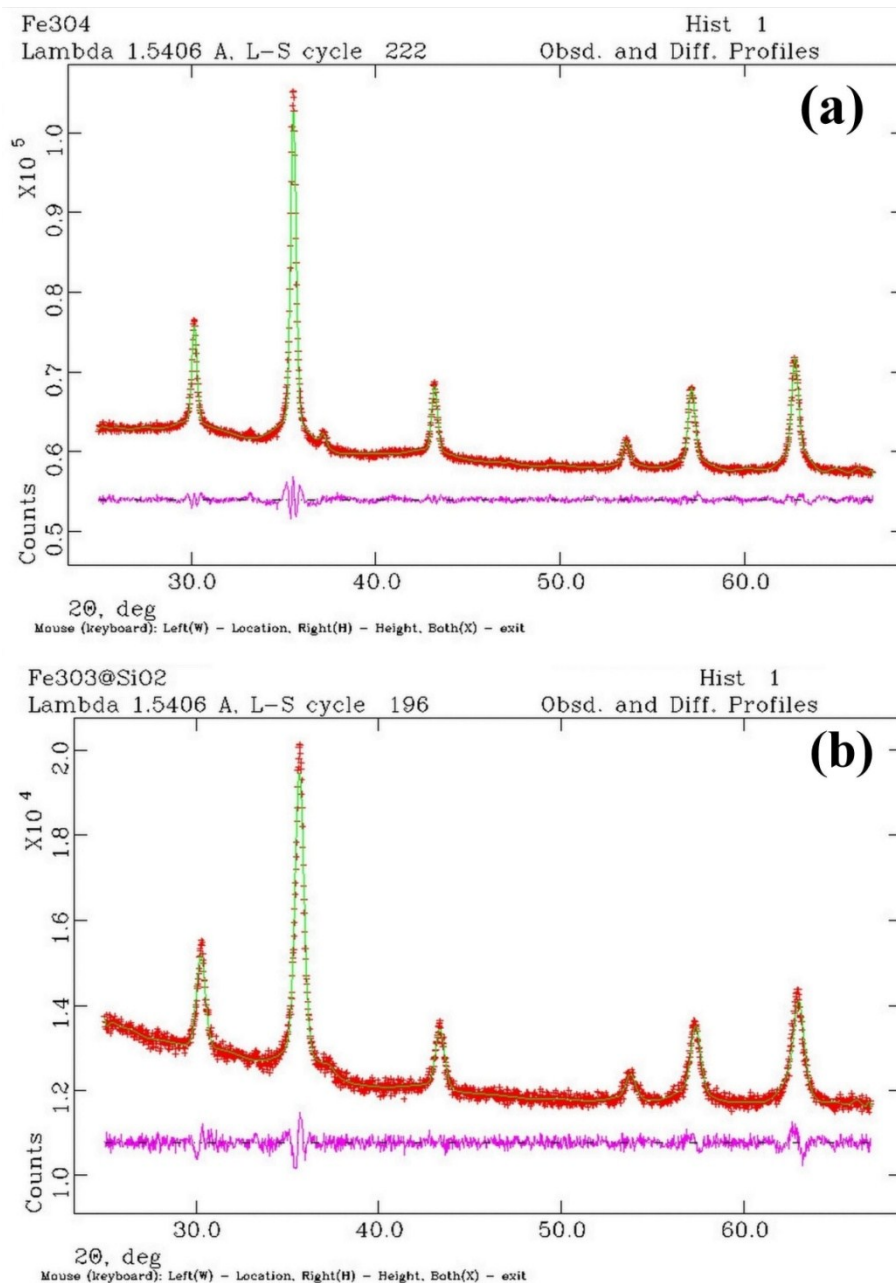

**Fig. S2**

**Fig.S2** The final Rietveld plot (output file of GSAS) of (a) S1 and (b) S2, showing the difference (pink color line) between the experimental (orange color symbol) and the simulated pattern (green color line).

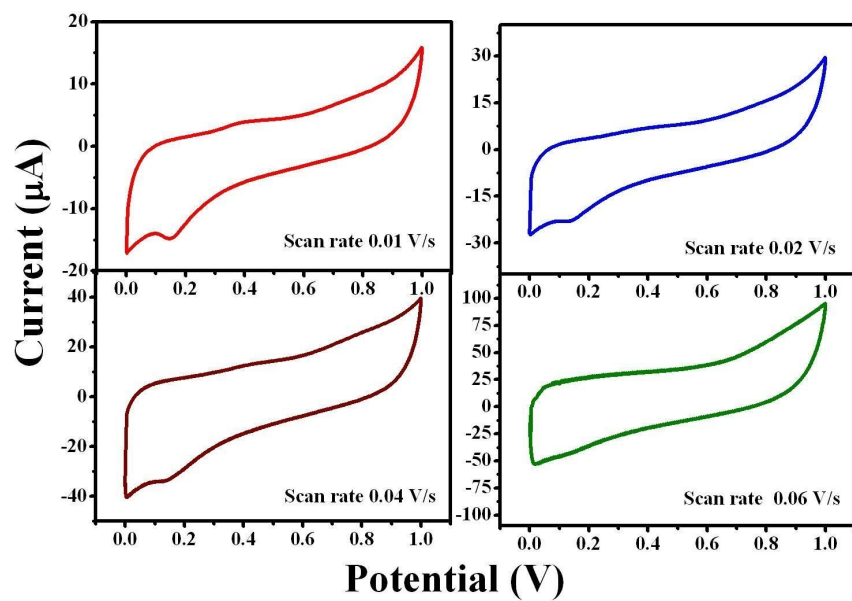

**Fig. S3**

**Fig.S3** Cyclic voltagram (CV) of ITO-S1 film at different scan rate.

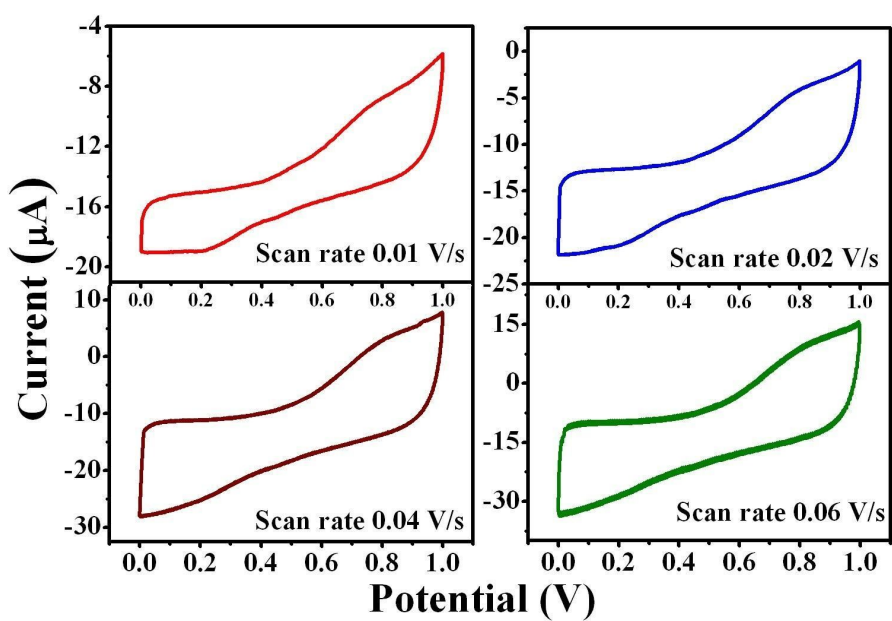

**Fig. S4**

**Fig.S4** Cyclic voltagram (CV) of ITO-S2 film at different scan rate.
